# Supplementary material for: Determination of 12 anti-obesity drugs in human plasma by a 96-well protein precipitation plate using HPLC-MS
Source: Royal Society of Chemistry journal article supplement (doi:10.1039/d2ra03423a), 2022-01-01
Supplement: d2ra03423a1.pdf [file d2ra03423a1.pdf]

Supplementary materials

Table S1 The instrumental detection limits (IDL) and the instrumental quantification limits (IQL) of analytes

| Compounds | IDL (ng·mL <sup>-1</sup> ) | IQL (ng·mL <sup>-1</sup> ) |
|-----------|----------------------------|----------------------------|
| MER       | 0.15                       | 0.48                       |
| AMP       | 0.13                       | 0.43                       |
| FEN       | 0.03                       | 0.10                       |
| BUP       | 0.03                       | 0.09                       |
| FLU       | 0.02                       | 0.07                       |
| SIBU      | 0.03                       | 0.10                       |
| BISA      | 0.01                       | 0.40                       |
| BUM       | 0.15                       | 0.50                       |
| LOVA      | 0.15                       | 0.49                       |
| SIM       | 0.15                       | 0.50                       |
| RIMO      | 0.03                       | 0.10                       |
| FENO      | 0.15                       | 0.48                       |
